# Supplementary material
Source: PubMed Central journal article supplement (PMC3103763)

Table S2. Conservation of M23 peptidase domain-bearing peptides predicted from *T. pallidum* and *T. denticola* genomes. *T. pallidum* proteins were identified by BLAST analyses using the amino acid sequence of Tp0155 against the *T. pallidum* genome (TIGR Comprehensive Microbial Resource). % identity of corresponding *T. pallidum* and *T. denticola* genes is included. TDE1136 was omitted from analysis as no similar truncated sequence is present in the *T. pallidum* genome.

| <i>T. denticola</i><br>protein | Most similar<br><i>T. pallidum</i> protein | LysM<br>domains | M23 peptidase<br>domain | % identity |
|--------------------------------|--------------------------------------------|-----------------|-------------------------|------------|
| TDE2318                        | Tp0155                                     | 2               | 1                       | 42.7       |
| TDE1738                        | Tp0706                                     | 1               | 1                       | 50         |
| TDE2753                        | Tp0864                                     | 2               | 1                       | 31.6       |
| TDE0110                        | Tp0049                                     | 0               | 1                       | 47.1       |
| TDE1297                        | Tp0444                                     | 2               | 1                       | 32.1       |
| TDE2189                        | Tp0702                                     | 0               | 1                       | 21.6       |

1 Fig. S4. Dose-dependent binding to matrix (◆) or plasma fibronectin (■), or to BSA blocked  
2 wells alone (Δ) of recombinant *T. denticola* peptides with homology to *T. pallidum* Tp0155. (a)  
3 rTDE2318 (b) rTDE2753 (c) rTDE1738 (d) rTDE1297 (e) rTDE1136. Matrix or plasma  
4 fibronectin (0 or 5 μg), coated onto plastic wells, was incubated with increasing concentrations  
5 of recombinant *T. denticola* proteins and binding was detected with anti tetra His and HRP  
6 conjugated secondary antibodies and then color reagent *o*-phenylenediamine ( $A_{490}$ ). Error bars  
7 indicate  $\pm$  SD of the mean from triplicates of a representative experiment.

Supplemental data Fig. S4 (b/w)

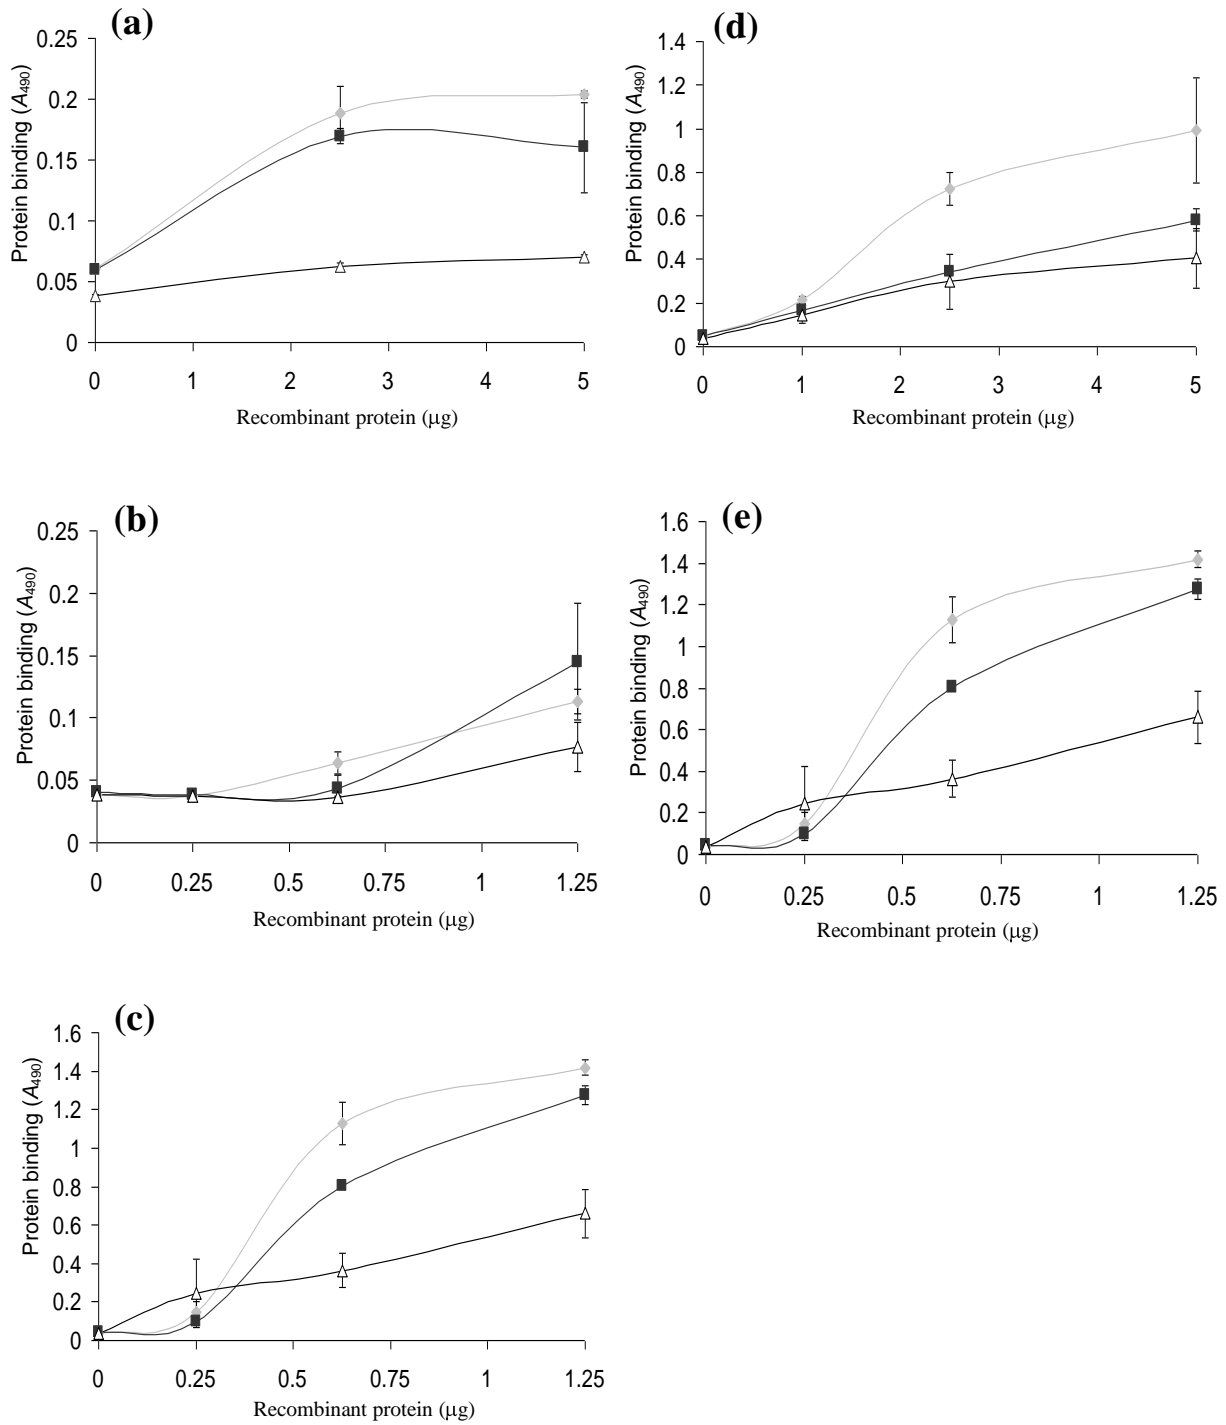

Supplement: NIHMS283931-supplement-Supp_Table_S2___Fig_S4.pdf [file NIHMS283931-supplement-Supp_Table_S2___Fig_S4.pdf]
